# Supplementary material for: Gene Model Annotations for Drosophila melanogaster: The Rule-Benders
Source: PubMed Central journal article supplement (PMC4528330; doi:10.1534/g3.115.018937), 2015-06-24
Supplement: supp_g3.115.018937_018937SI.pdf [file supp_g3.115.018937_018937SI.pdf]

SUPPORTING INFORMATION

**Gene Model Annotations for *Drosophila melanogaster*: The Rule-Benders**

Madeline A. Crosby<sup>\*1</sup>, L. Sian Gramates<sup>\*</sup>, Gilberto dos Santos<sup>\*</sup>, Beverley B. Matthews<sup>\*</sup>, Susan E. St. Pierre<sup>\*</sup>, Pinglei Zhou<sup>\*</sup>, Andrew J. Schroeder<sup>\*</sup>, Kathleen Falls<sup>\*</sup>, David B. Emmert<sup>\*</sup>, Susan M. Russo<sup>\*</sup>, William M. Gelbart<sup>\*</sup>, and the FlyBase Consortium

<sup>\*</sup>Department of Molecular and Cellular Biology, Harvard University, Cambridge, MA 02138

<sup>1</sup>Corresponding author: FlyBase, Biological Laboratories, Harvard University, 16 Divinity Avenue, Cambridge, MA 02138, 617.495.9925, [crosby@morgan.harvard.edu](mailto:crosby@morgan.harvard.edu)

**DOI: 10.1534/g3.115.018937**

**Figures and tables in Supporting Information (this file)**

**Figure S1.** Polycistronic locus with monocistronic, dicistronic and tricistronic alternative transcripts.

**Figure S2.** Conservation of protein sequence beyond stop-codon readthroughs.

**Table S1:** Standardized comments used by FlyBase for flagging exceptional transcripts

**Table S2:** GenBank flags used in transcript and protein RefSeq entries

**Table S3:** Genes annotated with a non-AUG translation start in release 6.04

**Supporting Information submitted as separate files:**

**File S1** Complete listing of polycistronic loci.

**File S2** Complete listing of genes that share exons with other genes.

**File S3** Complete listing of genes with multiphasic exons.

**File S4** Listing of all annotated introns with non-canonical splices.

**File S5** Complete listing of genes annotated with a stop-codon readthrough.

**Available for download as Excel files at [www.g3journal.org/lookup/suppl/doi:10.1534/g3.115.018937/-/DC1](http://www.g3journal.org/lookup/suppl/doi:10.1534/g3.115.018937/-/DC1)**

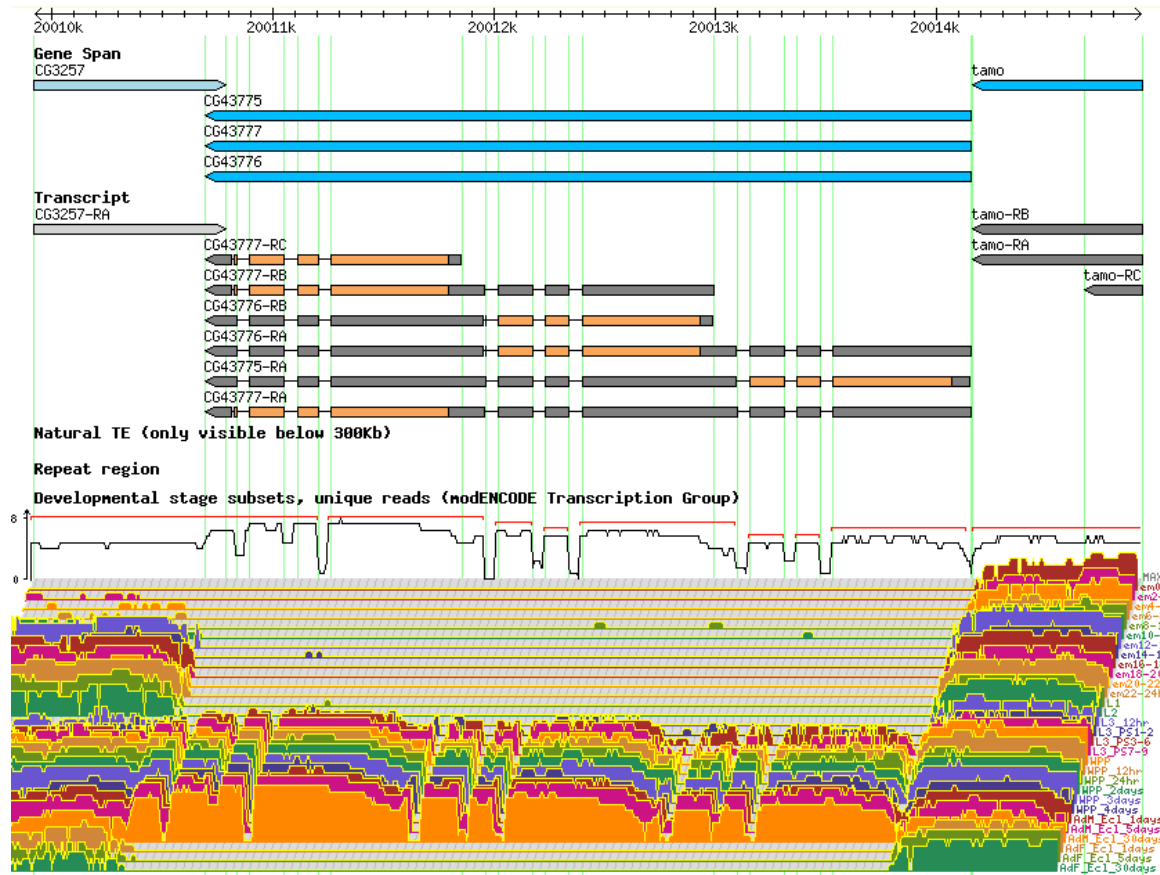

**Figure S1** Polycistronic locus with monocistronic, dicistronic and tricistronic alternative transcripts. All annotated introns are supported by cDNA and RNA-Seq junction data; downstream transcription start sites are supported by RAMPAGE TSS data. A GBrowse view showing (top to bottom) the gene extents and the gene models; unstranded RNA-Seq coverage data corresponding to a developmental series (early embryos, top, to adults, bottom). More information on data presented in GBrowse may be found at [http://flybase.org/wiki/FlyBase:GBrowse\\_Tracks#General](http://flybase.org/wiki/FlyBase:GBrowse_Tracks#General).

CLUSTAL 2.1 multiple sequence alignment

```

Dmel_trn-PB      IRETIKGLWGNLSALGRKEREYQKTFCEDEYMSRQHHPHPCSLGIHSTFPNTYAPHH--P 58
Dpse_trn        IREYLKGLWGSALGRKEREYQKTFCEDEYMARHQHHPHPCSLGIHSTFPNTYAPHH--P 58
Dvir_trn        IREYLKGGVWGNLSALGRKEREYQKTFCEDEYMSRLQHHPHPCSLGIHSTFPNTYAPHQATA 60
Dgri_trn        IREYLKGLWGNLSALGRKEREYQKTFCEDEYMSRLQHHPHPCSLGIHSTFPNTYAPHQTTA 60
Dmel_caps-PD    IREMLKG---HSALGRKEREYQKTFSEDEYMSRPP-PGGGG-VHPAAGG-----YP 46
Dpse_caps       IREMLKG---HSALGRKEREYQKTFSEDEYMRTPP-PGCGG-VHPAAA-----YP 45
Dgri_caps       IRELKFG---HSALGRKEREYQKTFSEDEYMRTPPAPGCVGGVHPGSG-----YP 47
Dvir_caps       IREMLKG---HSALGRKEREYQKTFSEDEYMRTPP-PGCGG-VHPASG-----YP 45
* * : * *      * * * * * * * * * * * * * * * * * * * * * * * * * * * * * *
Dmel_trn-PB      GAT---HHYGMCP-MPVNDLGAII-DPQKFKQLVVP-----TATMIS-EKK 98
Dpse_trn        SAPG---HHYGMCTGMPINDLNAAGDPQKFKQLVVP-----TGLSMN-EKK 102
Dvir_trn        SAP---HHHYGMCP-MPINDLNAV--DGQHKFKQLVVP-----ITATLMH-EKK 102
Dgri_trn        AAAAAHHHYGMCP-MPINDLNSG--DGQHKLQLQVPA-----MSATLLHTEQK 107
Dmel_caps-PD    YIAG-----NSRMIPVTELXLEAPPPQLRGRGG-----GGGASTAS--GA 85
Dpse_caps       CSQSQ---YMGSRPIPVTLELXLEAPPPQMRGRGGIASTTTTTTSSGSGSSGSAAP 101
Dgri_caps       CPSSYNTTYQLGSRPIPVTLELXLEVPPPPQLRGRGG-----APTSH-----GAS 91
Dvir_caps       CPSGINSSQYLGSRSIPVTELXLEAPPPQLRGRGG-----APSSHNGPMASSTSGTP 98
. : : : *      . : : : *      . : : : *      . : : : *
Dmel_trn-PB      LNNNKALVSQGAIDDSASFVLMKATMGRDQVH-----QNPQ-----136
Dpse_trn        LNNNKALASQAAIDDSASFVLMKATLARDHLQ-----QHPHPHQHPQHPQ--QHQS 155
Dvir_trn        LNNNKSLA--GSVDSASFVLMKATMGRERQQQ-----AQLQQQHQLQQQQL--QQQHP 153
Dgri_trn        LNNNKALA--GSIDDSANFVLMKATMNRDQHQ-----QQQQQLQQQQQLPHQQHP 160
Dmel_caps-PD    VQQLQVPSAVDQAS--NSFAQLSHIHYMTNNGQ-----QQAQQQSTSKMHHSQ 133
Dpse_caps       LQQLQVPSVDHAAAASSFAQLSHIHYMTN-----QTIASPMTPNQMHHSQ 148
Dgri_caps       LQQLQVPSAIDA--HAPFAQLSHIHYMTNPLTASSAASAAAASTTATTPRSHHSQ 149
Dvir_caps       LQQLQ-VPSAVDAS-HAPFAQLSHIHYMTNPS-----AATTTATTPRSHHSQ 146
. : : : *      . : : : *      . : : : *      . : : : *
Dmel_trn-PB      ---LNHYTKPQFLSATAVGDSCYS---YADVPMVHGAPLGGP--NQQLRLTQEHFK 186
Dpse_trn        VQSKLNHYTKPQFLSATAAVGDSCYS---YADVPMVHAAPLGAAPLQQLRLTHEHFK 211
Dvir_trn        HQSKLNHYTKPQFLAATAVADSCYS---YADVPMVHAP-----QQLRVTHEHFK 200
Dgri_trn        QQSKLNHYTKPQFLAATAVADSCYS---YADVPLVHAP-----QQLRITHEHFK 207
Dmel_caps-PD    QDMRLLACNGGKTLNA-TSLPRHRP---PVVQESTLSHYSQP---LANGIRLTQDHFN 184
Dpse_caps       QDMRLLANGGGKTLNA-ASLPRHR---MQESTLSHYSOPLA---LANGIRLTQDHFN 198
Dgri_caps       QDMRLLANG--KALGLNASLPRHMAGRQCGVQESTLSHYSQVPG---IRLTQDHFN 200
Dvir_caps       QDMRLLANGGGKVLGLNASLPRHMAGRQCGVQESTLSHYSOPLAN--GHAGIRLTQDHFN 204
* * : * *      * * : * *      . : : *      . : : *      . : : * * *
Dmel_trn-PB      QR-----ELYDQEMGS-EILDHNYIYSNTHYSMPLE 216
Dpse_trn        HRVAGT-----GEHYDNEVNS-EILDPNYIYSNAHYSMPLE 246
Dvir_trn        QREQR-----PRDFEADINGEMDPNYIYSNAHYSMPLE 236
Dgri_trn        QRE-----RDFDENPLGEMDPNYIYSNAHYSMPLE 239
Dmel_caps-PD    HNQQ-----SHNQHYGG-VYAKPCDAMSEPGYIHNNSHYSPLD 223
Dpse_caps       HNSHGHHGHHGHHGHHGPHSLGHPHSHTTHGGGVYAKACDAMTEPGYIHNNSHYSPLD 258
Dgri_caps       HN-----GGVYAKPCDAMTEPGYIHNNSHYSPLD 230
Dvir_caps       HNGIGG-----GAGVYAKPCDAMAEAGYIHNNSHYSPLD 239
. : : * * * * *      . : : * * * * *
Dmel_trn-PB      QLGRSKTPTPPPMPALPLRNLG-----CATTGRRSFQKSAQKQQQNNNTLRQFTHX 270
Dpse_trn        QMGRSKTPTPPPMPALPLRNLG-----CATTGRRSFQKSA-----NNNTLRQFTHX 294
Dvir_trn        QMGRNKTPTPPVPALPLRNLG-----CATTGRRSFQK-TPAHNN-NTSTMRQFTHX 288
Dgri_trn        QMGRSKTPTPPPLPALPLRNLG-----CATTGRRSLQHRPTATN---TLRQFTHX 288
Dmel_caps-PD    HDLPP-SPTPTPPPMPALPLRNGVMALIHGNTTGRSFSN-----NNNVSTLSNNNH 275
Dpse_caps       HDLPP-SPTPTPPPMPALPLRNGVMALIHGNTTGRSFSNSNSNS-NNNVATLSNNNH 315
Dgri_caps       HDMPPTPTPPPMPALPLRNLGMLVHGNTTGRSFSNSNSNSNNNNVATLSNNNH 289
Dvir_caps       HDMPPTPTPPPMPALPLRNGMMLVHGNTTGRSFSN-----NNNVATLSNNNH 292
. : : * * * * *      . : : * * * * *
Dmel_trn-PB      -----SSTYRRRQLSIYA-- 283
Dpse_trn        -----STVDYRRRQLSIYA-- 308
Dvir_trn        -----SSEHYRRRQLSIYA-- 302
Dgri_trn        -----SSEHYRRRQLSIFA-- 302
Dmel_caps-PD    ---GIGGGV-VAVGGTVGNNGSLRRYH-- 300
Dpse_caps       ---GGGGGGGGGAILASSNNGSLRRYH-- 341
Dgri_caps       ---GLVLANG--CSG-INNNNGSLRRYH-- 311
Dvir_caps       GVGGGAVLVNGNYNTNGSNNNNGSLRRYH-- 322
. : : *      . : : *

```

**Figure S2** Conservation of protein sequence beyond stop-codon readthroughs. Clustal alignment (<http://www.ebi.ac.uk/Tools/msa/clustalw2/>) of the carboxy end of *tartan* gene proteins from several *Drosophila* species (if annotated with a short read-through extension) and the predicted carboxy end of *caps* gene proteins (if annotated with a long read-through extension) from several *Drosophila* species. The *caps* readthrough (denoted by 'X') is at alignment position 82; the *trn* readthrough is at alignment position 300. Note regions of low complexity, variable conservation and variable length interspersed with regions of protein sequence conservation.

**Table S1 Standardized comments used by FlyBase for flagging exceptional transcripts**

| <b>FlyBase transcript-associated standardized comments</b>                                                                                                                               |
|------------------------------------------------------------------------------------------------------------------------------------------------------------------------------------------|
| Polycistronic transcript.                                                                                                                                                                |
| Dicistronic transcript.                                                                                                                                                                  |
| Dicistronic transcript; alternative monocistronic transcript(s) exist.                                                                                                                   |
| Monocistronic transcript; alternative dicistronic transcript(s) exist.                                                                                                                   |
| Unconventional splice site postulated ( <i>[splice donor-acceptor specified]</i> ).                                                                                                      |
| Unconventional splice site invoked ( <i>[splice donor-acceptor specified]</i> ); sequence altered due to transposon insertion; this splice may not occur in vivo.                        |
| Unconventional splice site(s) invoked due to gap in genomic sequence; this splice does not occur in vivo.                                                                                |
| Unconventional splice site(s) invoked ( <i>[splice donor-acceptor]</i> ); within a dynamic region of nested TEs that may differ in different strains; this splice may not occur in vivo. |
| Unconventional splice site postulated: transcript subject to HAC1-type intron splice site recognition and cleavage.                                                                      |
| Trans-spliced.                                                                                                                                                                           |
| Unconventional translation start postulated ( <i>[codon specified]</i> encoding Met).                                                                                                    |
| Stop-codon suppression (UGA as Sec) postulated; reflected in aa sequence of predicted polypeptide.                                                                                       |
| Stop-codon suppression postulated ( <i>[codon specified]</i> ); reflected in aa sequence of predicted polypeptide.                                                                       |
| Double stop-codon suppression postulated ( <i>[codons specified]</i> ); reflected in aa sequence of predicted polypeptide.                                                               |
| Translational frameshifting postulated: +1 frameshift reflected in aa sequence of predicted polypeptide.                                                                                 |
| TAA stop codon is completed by the addition of 3' A residues to the mRNA.                                                                                                                |
| Start codon not determined.                                                                                                                                                              |

**Table S2 GenBank flags used in transcript and protein RefSeq entries**

| <b>GenBank flags for exceptional cases</b>                              |
|-------------------------------------------------------------------------|
| gene /exception="dicistronic gene" [transcript RefSeq entries only]     |
| CDS /exception="nonconsensus splice site"                               |
| CDS /trans_splicing                                                     |
| CDS /note="non-AUG ([ <i>codon specified</i> ]) translation initiation" |
| CDS /transl_except=(pos:x..y,aa:Met)                                    |
| CDS /transl_except=(pos:x..y,aa:Sec)                                    |
| CDS /transl_except=(pos:x..y,aa:OTHER)                                  |
| CDS /ribosomal_slippage                                                 |
| CDS /transl_table=5                                                     |
| CDS /transl_except=(pos:x,aa:TERM)                                      |
| CDS /note="TAA stop codon is completed by the addition of 3' A"         |
| CDS /note="start codon not determined"                                  |

**Table S3 Genes annotated with a non-AUG translation start in release 6.04**

| Gene     | Start codon | Reference (FlyBase Reference ID)                                            |
|----------|-------------|-----------------------------------------------------------------------------|
| Eip74EF  | CUG         | Burtis <i>et al</i> 1990 (FBrf0051390), Boyd and Thummel 1993 (FBrf0064374) |
| cpo      | CUG         | Bellen <i>et al</i> 1992 (FBrf0056119)                                      |
| ewg      | CUG         | de Simone and White 1993 (FBrf0059052)                                      |
| Eip78C   | CUG         | Stone and Thummel 1993 (FBrf0064719)                                        |
| Syn      | CUG         | Klagges <i>et al</i> 1996 (FBrf0087510)                                     |
| att-ORFA | CUG         | Madigan <i>et al</i> 1996 (FBrf0089733)                                     |
| Fmr1     | CUG         | Beerman and Jongens 2011 (FBrf0213401)                                      |
| Trpy     | CUG         | FlyBase analysis                                                            |
| CG4629   | CUG         | FlyBase analysis                                                            |
| CG11076  | CUG         | FlyBase analysis                                                            |
| CG16890  | CUG         | FlyBase analysis                                                            |
| Cha      | GUG         | Sugihara <i>et al.</i> 1990 (FBrf0052176)                                   |
| Akt1     | GUG         | FlyBase analysis                                                            |
| Klp54D   | ACG         | Andjelkovic <i>et al.</i> 1995 (FBrf0079853)                                |
| NAT1     | AUU         | Takahashi <i>et al</i> 2005 (FBrf0184018)                                   |
| Gsc      | AUU         | FlyBase analysis                                                            |
| CG11836  | AUU         | FlyBase analysis                                                            |
| Wnk      | AUU         | FlyBase analysis                                                            |
| Sh       | AUU         | FlyBase analysis                                                            |
| CG14989  | UUG         | FlyBase analysis                                                            |
| Jwa      | UUG         | FlyBase analysis                                                            |
| sol      | UUG         | FlyBase analysis                                                            |
| CG43778  | UUG         | FlyBase analysis                                                            |
| CG2162   | AUC         | FlyBase analysis                                                            |
| CG43921  | AUC         | FlyBase analysis                                                            |
| CG30334  | AUC         | FlyBase analysis                                                            |
| CG43273  | AUC         | FlyBase analysis                                                            |
