# Supplementary material for: Gene Model Annotations for Drosophila melanogaster: The Rule-Benders
Source: PubMed Central journal article supplement (PMC4528330; doi:10.1534/g3.115.018937), 2015-06-24
Supplement: supp_g3.115.018937_FigureS1.pdf [file supp_g3.115.018937_FigureS1.pdf]

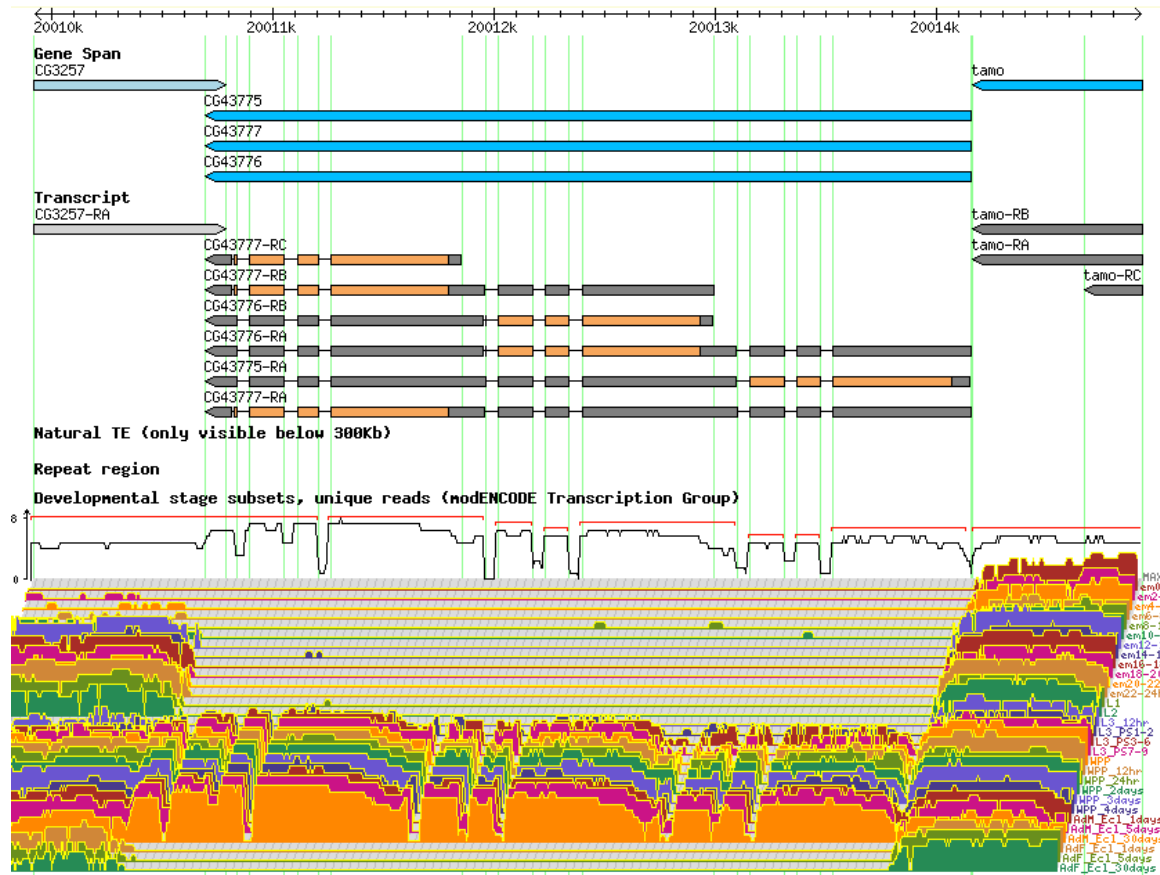

**Figure S1** Polycistronic locus with monocistronic, dicistronic and tricistronic alternative transcripts. All annotated introns are supported by cDNA and RNA-Seq junction data; downstream transcription start sites are supported by RAMPAGE TSS data. A GBrowse view showing (top to bottom) the gene extents and the gene models; unstranded RNA-Seq coverage data corresponding to a developmental series (early embryos, top, to adults, bottom). More information on data presented in GBrowse may be found at [http://flybase.org/wiki/FlyBase:GBrowse\\_Tracks#General](http://flybase.org/wiki/FlyBase:GBrowse_Tracks#General).
