# Supplementary material for: Gene Model Annotations for Drosophila melanogaster: The Rule-Benders
Source: PubMed Central journal article supplement (PMC4528330; doi:10.1534/g3.115.018937), 2015-06-24
Supplement: supp_g3.115.018937_TableS1.pdf [file supp_g3.115.018937_TableS1.pdf]

**Table S1 Standardized comments used by FlyBase for flagging exceptional transcripts**

| <b>FlyBase transcript-associated standardized comments</b>                                                                                                                               |
|------------------------------------------------------------------------------------------------------------------------------------------------------------------------------------------|
| Polycistronic transcript.                                                                                                                                                                |
| Dicistronic transcript.                                                                                                                                                                  |
| Dicistronic transcript; alternative monocistronic transcript(s) exist.                                                                                                                   |
| Monocistronic transcript; alternative dicistronic transcript(s) exist.                                                                                                                   |
| Unconventional splice site postulated ( <i>[splice donor-acceptor specified]</i> ).                                                                                                      |
| Unconventional splice site invoked ( <i>[splice donor-acceptor specified]</i> ); sequence altered due to transposon insertion; this splice may not occur in vivo.                        |
| Unconventional splice site(s) invoked due to gap in genomic sequence; this splice does not occur in vivo.                                                                                |
| Unconventional splice site(s) invoked ( <i>[splice donor-acceptor]</i> ); within a dynamic region of nested TEs that may differ in different strains; this splice may not occur in vivo. |
| Unconventional splice site postulated: transcript subject to HAC1-type intron splice site recognition and cleavage.                                                                      |
| Trans-spliced.                                                                                                                                                                           |
| Unconventional translation start postulated ( <i>[codon specified]</i> encoding Met).                                                                                                    |
| Stop-codon suppression (UGA as Sec) postulated; reflected in aa sequence of predicted polypeptide.                                                                                       |
| Stop-codon suppression postulated ( <i>[codon specified]</i> ); reflected in aa sequence of predicted polypeptide.                                                                       |
| Double stop-codon suppression postulated ( <i>[codons specified]</i> ); reflected in aa sequence of predicted polypeptide.                                                               |
| Translational frameshifting postulated: +1 frameshift reflected in aa sequence of predicted polypeptide.                                                                                 |
| TAA stop codon is completed by the addition of 3' A residues to the mRNA.                                                                                                                |
| Start codon not determined.                                                                                                                                                              |
