# Supplementary material for: Gene Model Annotations for Drosophila melanogaster: The Rule-Benders
Source: PubMed Central journal article supplement (PMC4528330; doi:10.1534/g3.115.018937), 2015-06-24
Supplement: supp_g3.115.018937_TableS2.pdf [file supp_g3.115.018937_TableS2.pdf]

**Table S2 GenBank flags used in transcript and protein RefSeq entries**

| <b>GenBank flags for exceptional cases</b>                              |
|-------------------------------------------------------------------------|
| gene /exception="dicistronic gene" [transcript RefSeq entries only]     |
| CDS /exception="nonconsensus splice site"                               |
| CDS /trans_splicing                                                     |
| CDS /note="non-AUG ([ <i>codon specified</i> ]) translation initiation" |
| CDS /transl_except=(pos:x..y,aa:Met)                                    |
| CDS /transl_except=(pos:x..y,aa:Sec)                                    |
| CDS /transl_except=(pos:x..y,aa:OTHER)                                  |
| CDS /ribosomal_slippage                                                 |
| CDS /transl_table=5                                                     |
| CDS /transl_except=(pos:x,aa:TERM)                                      |
| CDS /note="TAA stop codon is completed by the addition of 3' A"         |
| CDS /note="start codon not determined"                                  |
