# Supplementary material for: Gene Model Annotations for Drosophila melanogaster: The Rule-Benders
Source: PubMed Central journal article supplement (PMC4528330; doi:10.1534/g3.115.018937), 2015-06-24
Supplement: supp_g3.115.018937_TableS3.pdf [file supp_g3.115.018937_TableS3.pdf]

**Table S3 Genes annotated with a non-AUG translation start in release 6.04**

| Gene     | Start codon | Reference (FlyBase Reference ID)                                            |
|----------|-------------|-----------------------------------------------------------------------------|
| Eip74EF  | CUG         | Burtis <i>et al</i> 1990 (FBrf0051390), Boyd and Thummel 1993 (FBrf0064374) |
| cpo      | CUG         | Bellen <i>et al</i> 1992 (FBrf0056119)                                      |
| ewg      | CUG         | de Simone and White 1993 (FBrf0059052)                                      |
| Eip78C   | CUG         | Stone and Thummel 1993 (FBrf0064719)                                        |
| Syn      | CUG         | Klagges <i>et al</i> 1996 (FBrf0087510)                                     |
| att-ORFA | CUG         | Madigan <i>et al</i> 1996 (FBrf0089733)                                     |
| Fmr1     | CUG         | Beerman and Jongens 2011 (FBrf0213401)                                      |
| Trpy     | CUG         | FlyBase analysis                                                            |
| CG4629   | CUG         | FlyBase analysis                                                            |
| CG11076  | CUG         | FlyBase analysis                                                            |
| CG16890  | CUG         | FlyBase analysis                                                            |
| Cha      | GUG         | Sugihara <i>et al.</i> 1990 (FBrf0052176)                                   |
| Akt1     | GUG         | FlyBase analysis                                                            |
| Klp54D   | ACG         | Andjelkovic <i>et al.</i> 1995 (FBrf0079853)                                |
| NAT1     | AUU         | Takahashi <i>et al</i> 2005 (FBrf0184018)                                   |
| Gsc      | AUU         | FlyBase analysis                                                            |
| CG11836  | AUU         | FlyBase analysis                                                            |
| Wnk      | AUU         | FlyBase analysis                                                            |
| Sh       | AUU         | FlyBase analysis                                                            |
| CG14989  | UUG         | FlyBase analysis                                                            |
| Jwa      | UUG         | FlyBase analysis                                                            |
| sol      | UUG         | FlyBase analysis                                                            |
| CG43778  | UUG         | FlyBase analysis                                                            |
| CG2162   | AUC         | FlyBase analysis                                                            |
| CG43921  | AUC         | FlyBase analysis                                                            |
| CG30334  | AUC         | FlyBase analysis                                                            |
| CG43273  | AUC         | FlyBase analysis                                                            |
